# Supplementary material
Source: ML conference proceedings conference paper supplement (https://proceedings.mlr.press/v151/chen22e.html)

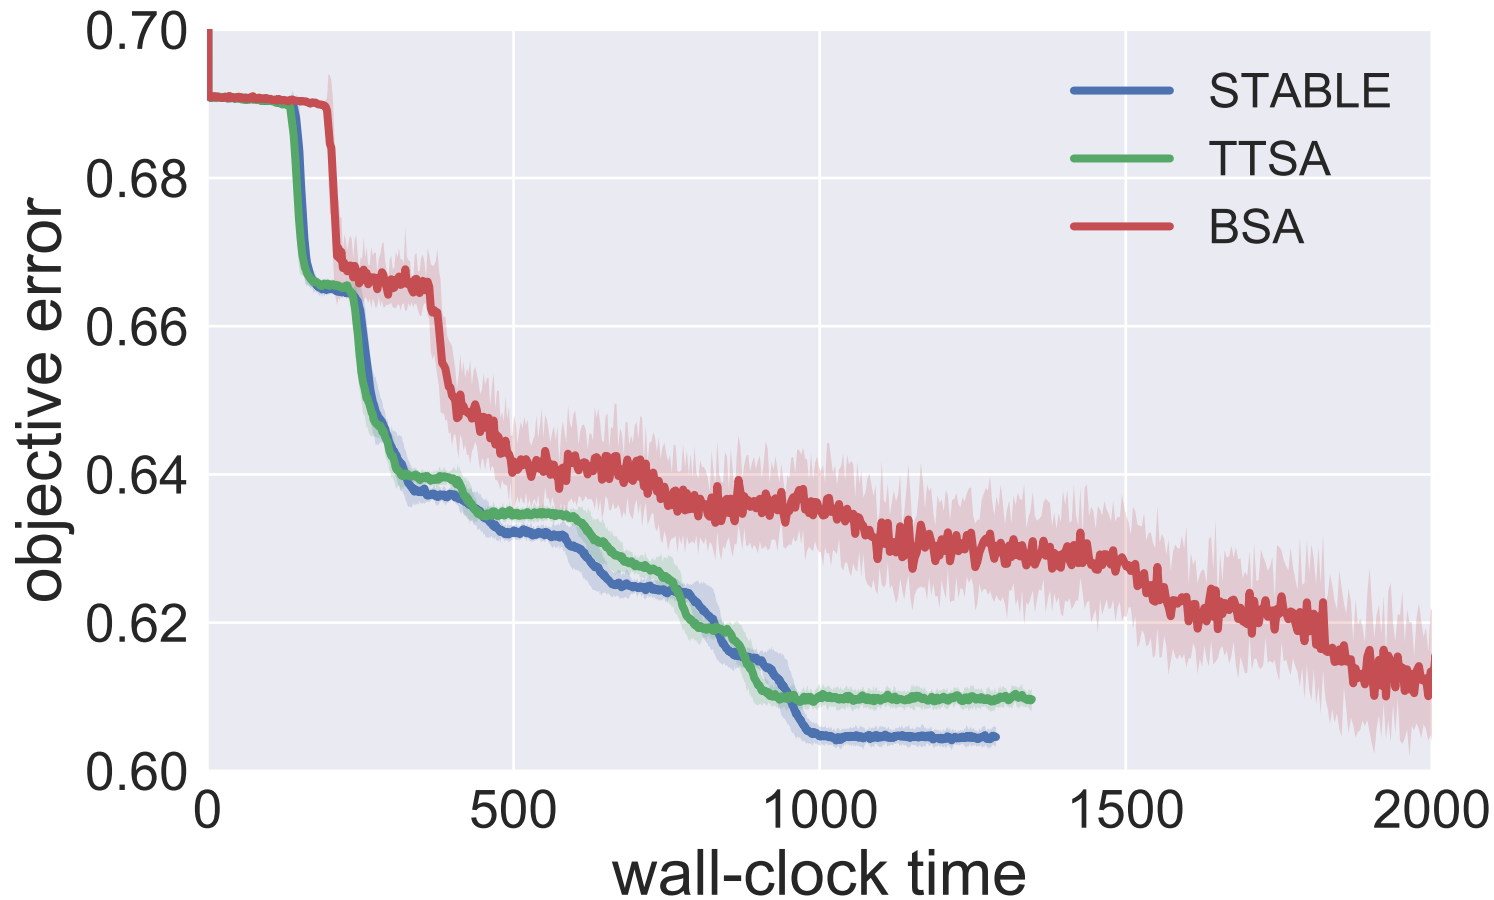

Supplement: Supplementary file 1 [file chen22e-supp.zip]

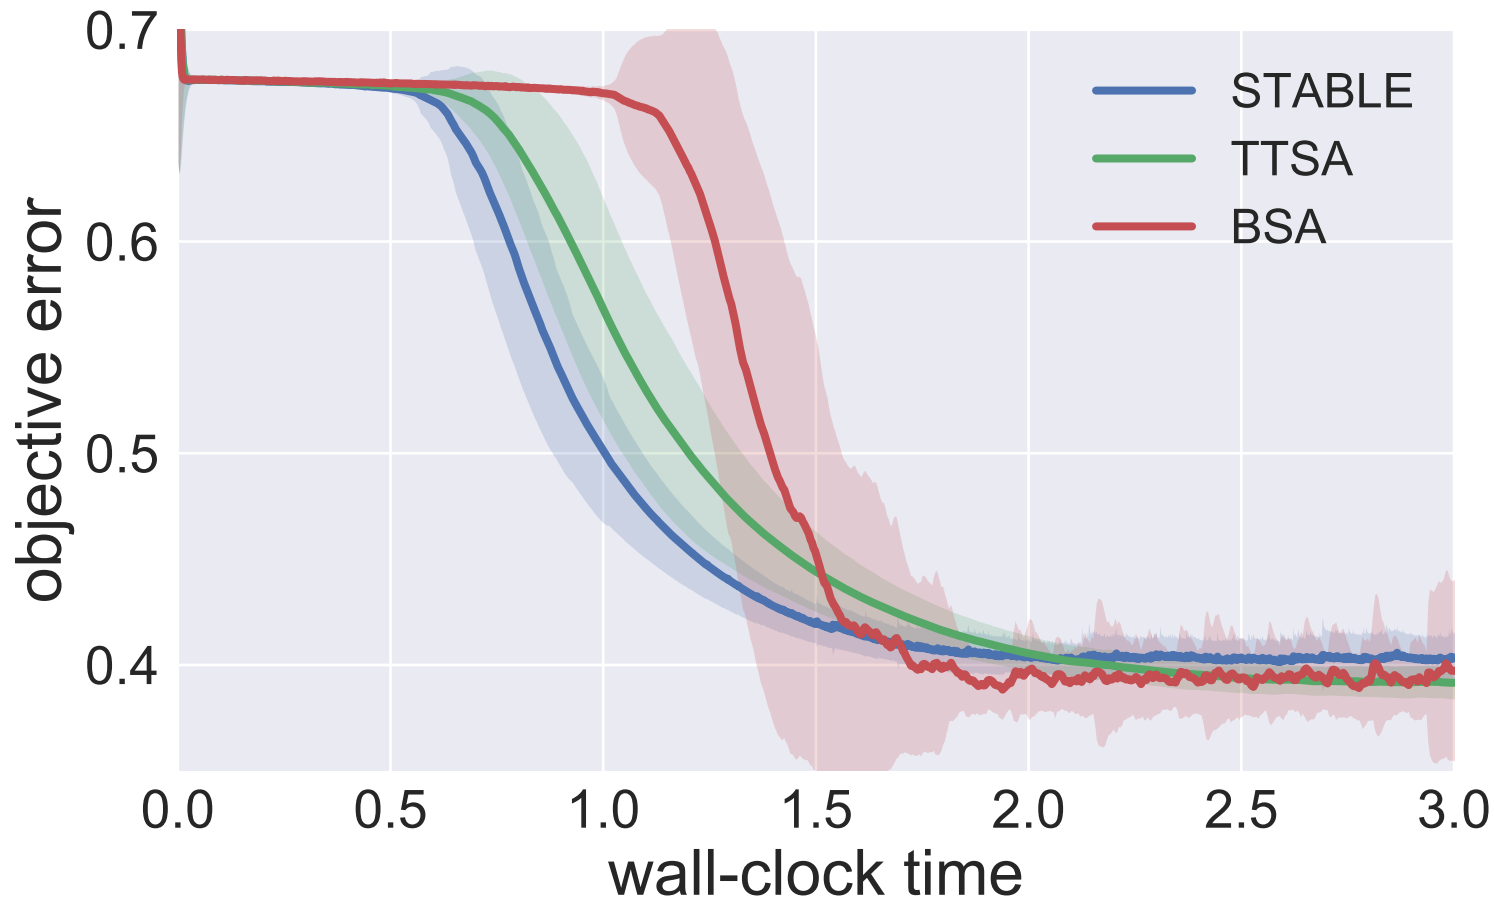

Supplement: Supplementary file 2 [file chen22e-supp.zip]

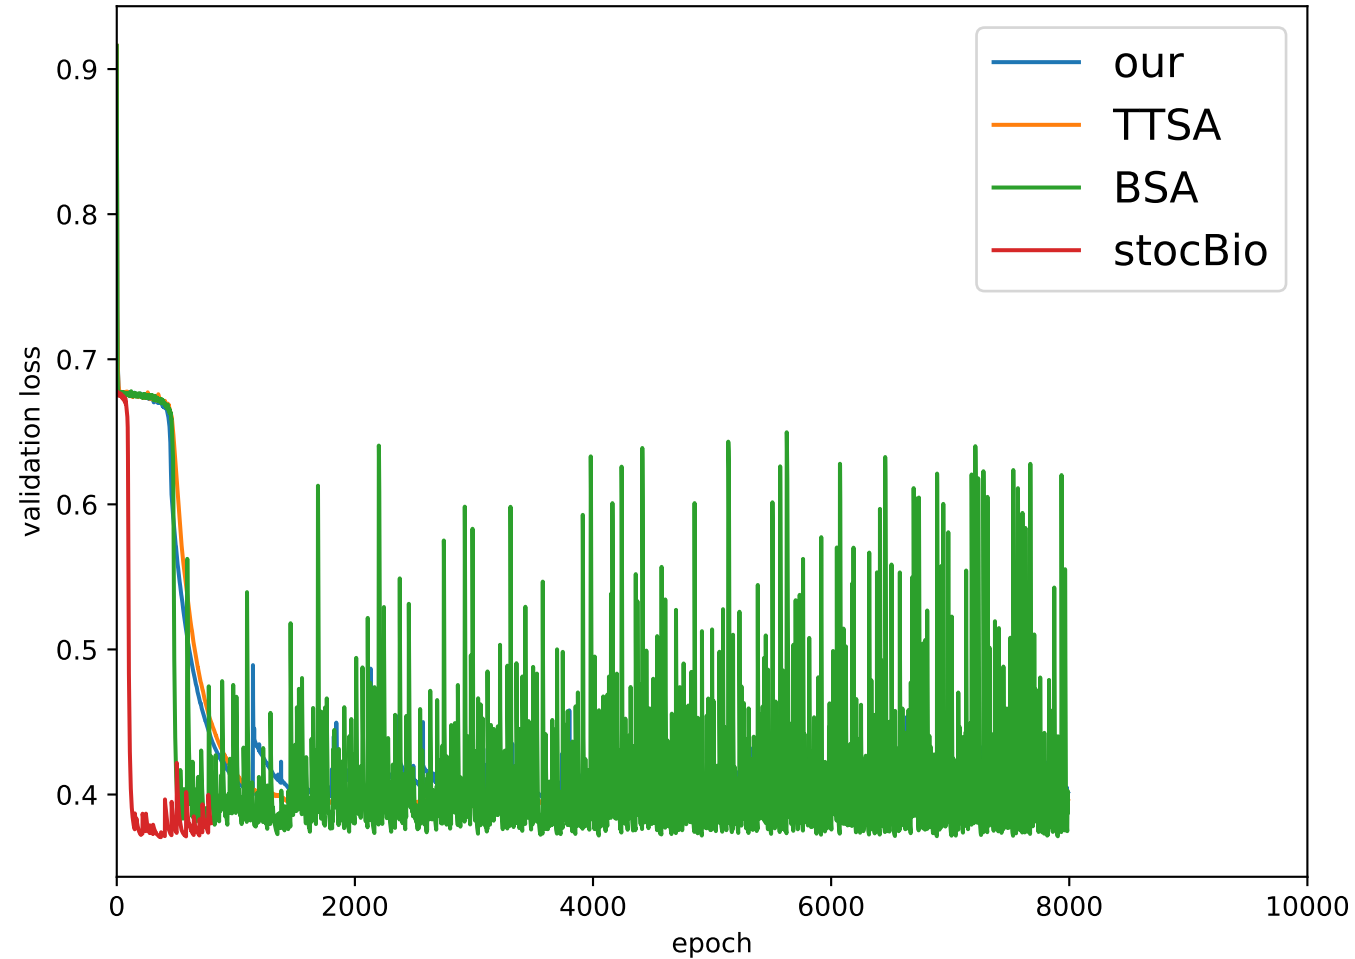

Supplement: Supplementary file 4 [file chen22e-supp.zip]

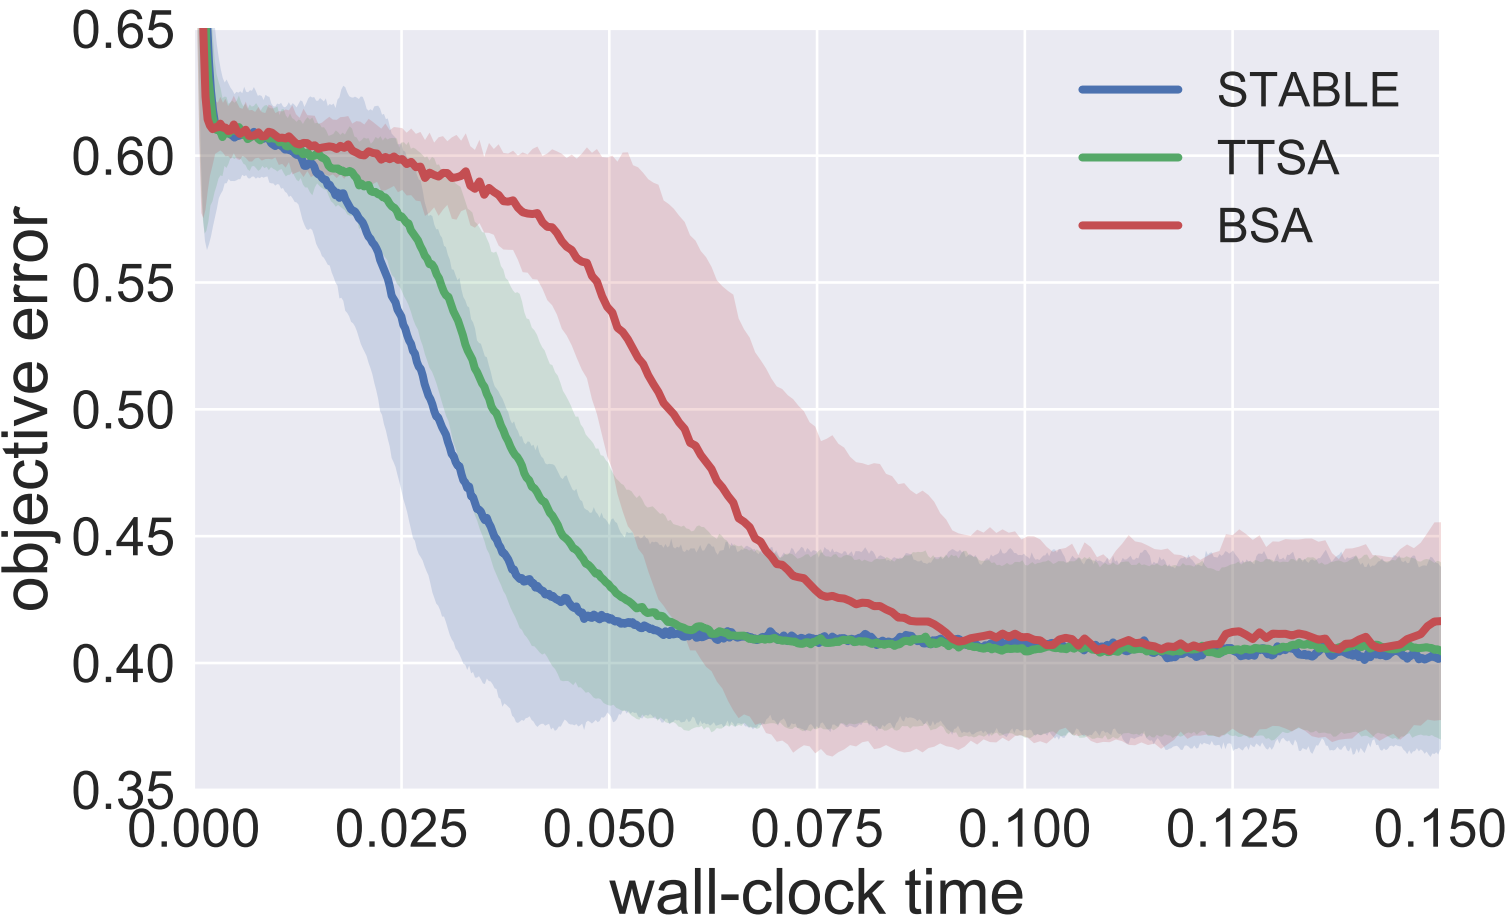

Supplement: Supplementary file 5 [file chen22e-supp.zip]

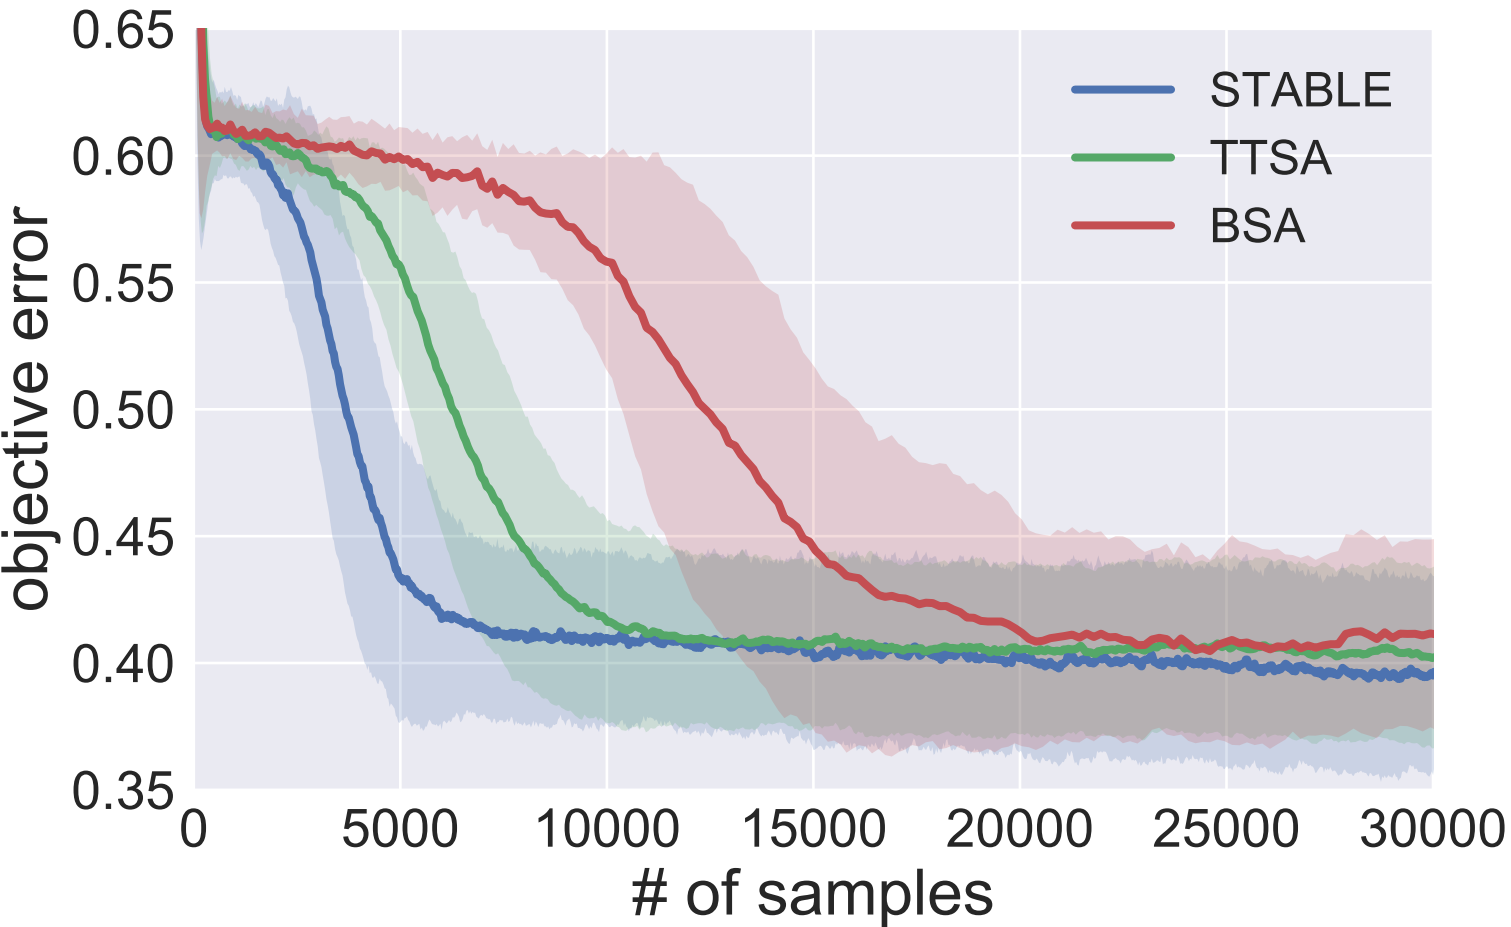

Supplement: Supplementary file 6 [file chen22e-supp.zip]

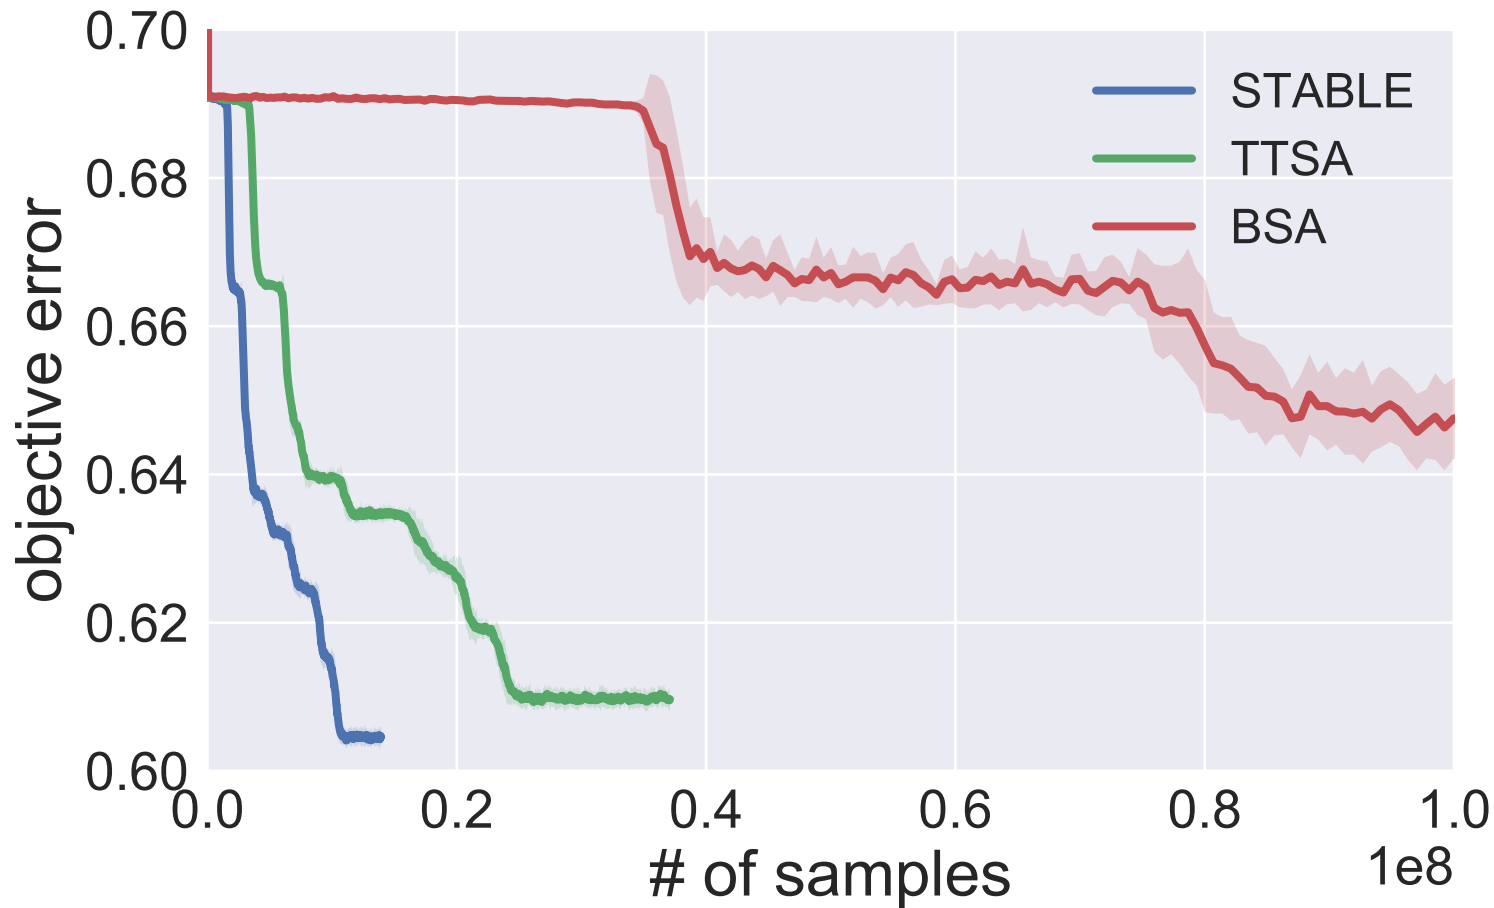

Supplement: Supplementary file 7 [file chen22e-supp.zip]

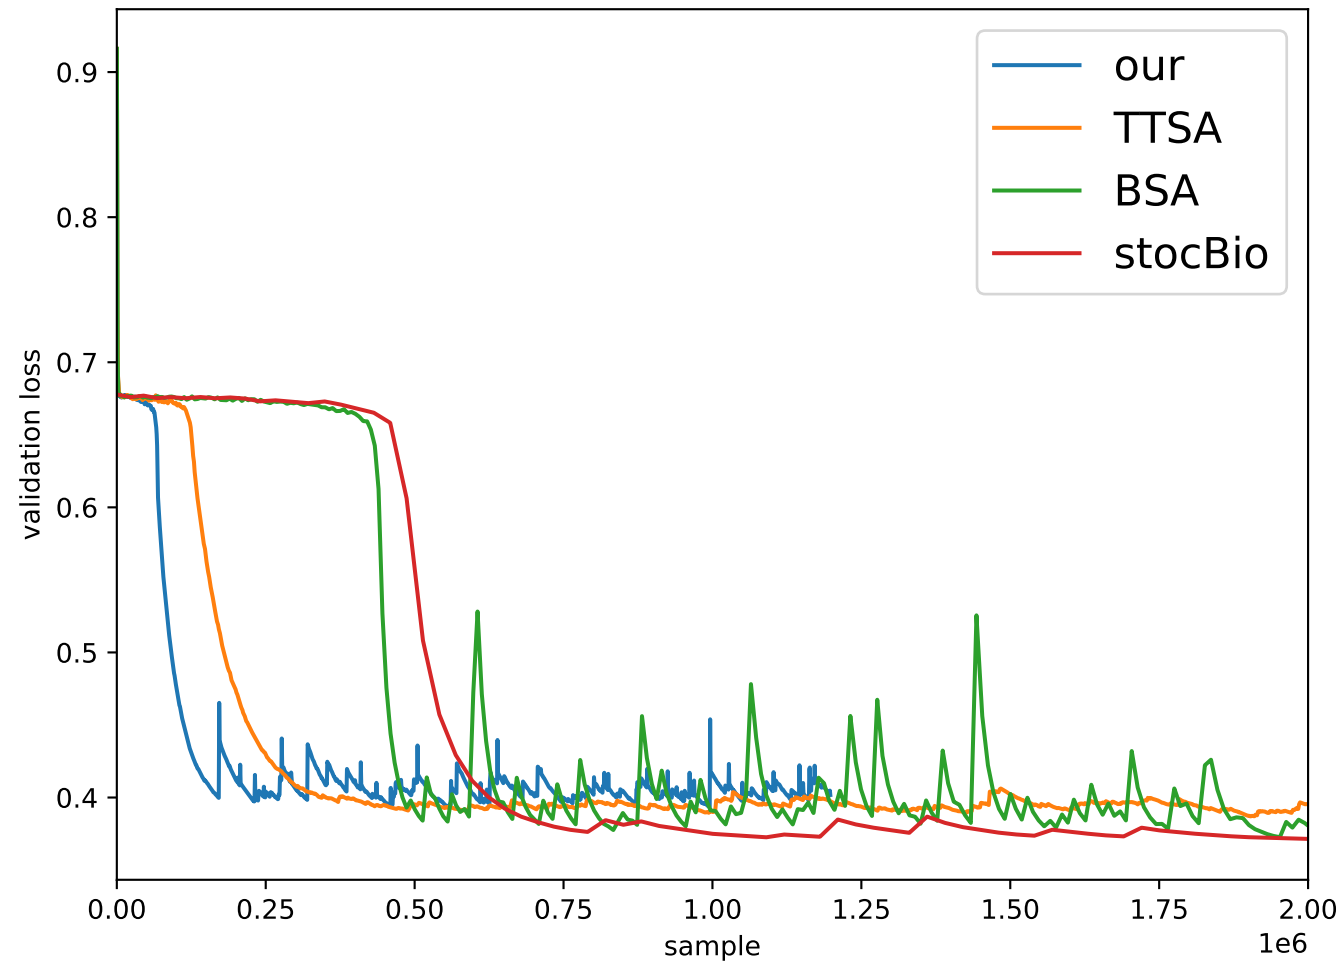

Supplement: Supplementary file 8 [file chen22e-supp.zip]

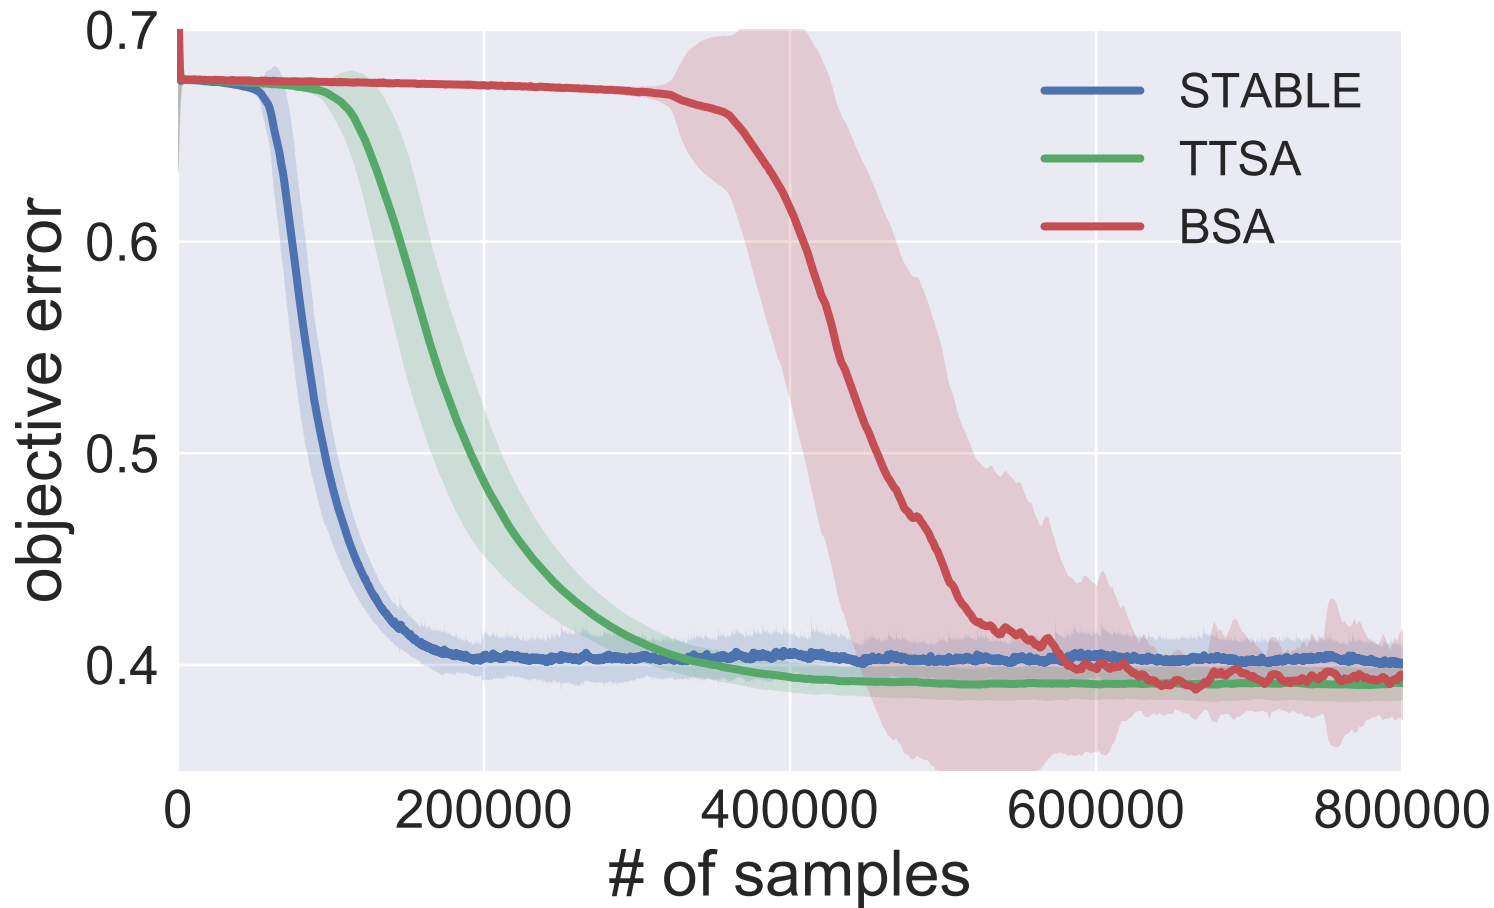

Supplement: Supplementary file 9 [file chen22e-supp.zip]
